# Supplementary material
Source: HighWire-hosted journal article supplement (http://jmg.bmj.com/highwire/filestream/160697/field_highwire_adjunct_files/1/JMG_TableS2_067533.pdf)
Supplement: JMG_TableS2_067533.pdf [file JMG_TableS2_067533.pdf]

**Table S1 Detailed SNP information of the homozygous region**

| Affymetrix SNP ID | Marker    | Chromosome | Physical Position | III:1  | III:2  | IV:1   | IV:5   | IV:6 | IV:10  | IV:7   | IV:11  |
|-------------------|-----------|------------|-------------------|--------|--------|--------|--------|------|--------|--------|--------|
| SNP_A-1512974     | rs2013961 | 20         | 2265490           | BB     | AA     | AB     | AB     | AB   | AB     | AB     | AB     |
| SNP_A-1511055     | rs1109010 | 20         | 2405887           | BB     | BB     | BB     | BB     | BB   | BB     | BB     | BB     |
| SNP_A-1512375     | rs3848810 | 20         | 3522148           | AA     | AA     | AA     | AA     | AA   | AA     | AA     | AA     |
| SNP_A-1509541     | rs910652  | 20         | 3675970           | AA     | AB     | AB     | AA     | AA   | AB     | AA     | AA     |
| SNP_A-1509668     | rs674110  | 20         | 3676026           | BB     | BB     | BB     | BB     | BB   | BB     | BB     | BB     |
| SNP_A-1517452     | rs910952  | 20         | 4141694           | BB     | BB     | BB     | BB     | BB   | BB     | BB     | BB     |
| SNP_A-1510407     | rs2422925 | 20         | 4251877           | AA     | AB     | AB     | AA     | AA   | AB     | AA     | AA     |
| SNP_A-1513801     | rs3904872 | 20         | 4260153           | NoCall | NoCall | NoCall | BB     | BB   | NoCall | NoCall | NoCall |
| SNP_A-1512173     | rs3904864 | 20         | 4327086           | AA     | AB     | AB     | AA     | AA   | AB     | AA     | AA     |
| SNP_A-1511202     | rs1411296 | 20         | 6437010           | AA     | AB     | AB     | AA     | AA   | AB     | AA     | AA     |
| SNP_A-1508028     | rs723131  | 20         | 6529919           | NoCall | AB     | NoCall | AB     | AB   | AA     | BB     | BB     |
| SNP_A-1512742     | rs2224191 | 20         | 6755276           | AA     | AA     | AA     | AA     | AA   | AA     | AA     | AA     |
| SNP_A-1508861     | rs723511  | 20         | 6786358           | AB     | AA     | AA     | AB     | AB   | AB     | AA     | AA     |
| SNP_A-1515430     | rs717087  | 20         | 6862914           | BB     | BB     | BB     | BB     | BB   | BB     | BB     | BB     |
| SNP_A-1519528     | rs952793  | 20         | 6918831           | AB     | AB     | AB     | AB     | AB   | BB     | AA     | AA     |
| SNP_A-1517385     | rs2149642 | 20         | 6962445           | AB     | AB     | AB     | AB     | AB   | BB     | AA     | AA     |
| SNP_A-1513440     | rs717074  | 20         | 7120538           | AA     | AA     | AA     | AA     | AA   | AA     | AA     | AA     |
| SNP_A-1513450     | rs720010  | 20         | 7174248           | AA     | AA     | AA     | AA     | AA   | AA     | AA     | AA     |
| SNP_A-1518624     | rs2009752 | 20         | 7188177           | AA     | AA     | AA     | NoCall | AA   | AA     | AA     | AA     |
| SNP_A-1513356     | rs724084  | 20         | 7223683           | BB     | BB     | BB     | BB     | BB   | BB     | BB     | BB     |
| SNP_A-1513218     | rs2224053 | 20         | 7254965           | AB     | AB     | AB     | AB     | AB   | BB     | AA     | AA     |
| SNP_A-1510348     | rs2223276 | 20         | 7830106           | BB     | BB     | BB     | BB     | BB   | BB     | BB     | BB     |
| SNP_A-1515069     | rs2250711 | 20         | 8203869           | BB     | BB     | NoCall | BB     | BB   | BB     | BB     | BB     |
| SNP_A-1509024     | rs813467  | 20         | 8361676           | AB     | AB     | AB     | AB     | AB   | BB     | AA     | AA     |
| SNP_A-1507452     | rs771943  | 20         | 8362876           | AB     | AB     | AB     | AB     | AB   | AA     | BB     | BB     |
| SNP_A-1518940     | rs1473685 | 20         | 8411131           | AA     | AB     | AB     | AA     | AA   | AB     | AA     | AA     |

|               |           |    |          |    |    |    |    |    |    |        |        |
|---------------|-----------|----|----------|----|----|----|----|----|----|--------|--------|
| SNP_A-1514966 | rs2223539 | 20 | 8489270  | AB | AA | AA | AB | AB | AB | AA     | AA     |
| SNP_A-1519337 | rs2206489 | 20 | 8714796  | BB | AB | AB | BB | BB | AB | BB     | BB     |
| SNP_A-1512276 | rs2327088 | 20 | 8714882  | AB | BB | BB | AB | AB | AB | BB     | BB     |
| SNP_A-1515630 | rs2143267 | 20 | 8757225  | BB     | BB     |
| SNP_A-1517103 | rs3848831 | 20 | 8799321  | AA | AB | AB | AA | AA | AB | AA     | AA     |
| SNP_A-1513028 | rs756374  | 20 | 8892142  | AB | AB | AB | AB | AB | AA | BB     | BB     |
| SNP_A-1514406 | rs724089  | 20 | 9001556  | AB | AA | AA | AB | AB | AB | AA     | AA     |
| SNP_A-1516905 | rs953021  | 20 | 9898715  | BB | AB | AB | BB | BB | AB | BB     | BB     |
| SNP_A-1514455 | rs725565  | 20 | 9953010  | AB | BB | BB | AB | AB | AB | BB     | BB     |
| SNP_A-1509328 | rs2327282 | 20 | 10375960 | AB | AB | AB | AB | AB | AA | BB     | BB     |
| SNP_A-1510576 | rs973542  | 20 | 10640559 | AB | BB | BB | AB | AB | AB | BB     | BB     |
| SNP_A-1519560 | rs2327302 | 20 | 10663404 | BB | AB | AB | BB | BB | AB | BB     | BB     |
| SNP_A-1509521 | rs763383  | 20 | 10845878 | AB | AB | AB | AB | AB | BB | AA     | AA     |
| SNP_A-1514736 | rs1028846 | 20 | 10960899 | AB | BB | BB | AB | AB | AB | BB     | BB     |
| SNP_A-1512494 | rs726867  | 20 | 11175697 | AB | AB | AB | AB | AB | BB | AA     | AA     |
| SNP_A-1508024 | rs3887413 | 20 | 11754851 | AB | BB | BB | AB | AB | AB | BB     | BB     |
| SNP_A-1508766 | rs803876  | 20 | 11798158 | AA     | AA     |
| SNP_A-1511241 | rs2206798 | 20 | 11845445 | BB | AB | AB | BB | BB | AB | BB     | BB     |
| SNP_A-1517499 | rs720489  | 20 | 11897114 | AA     | AA     |
| SNP_A-1510612 | rs729552  | 20 | 12131209 | AB | BB | BB | AB | AB | AB | BB     | BB     |
| SNP_A-1509951 | rs2208970 | 20 | 12325493 | AA     | AA     |
| SNP_A-1513642 | rs912086  | 20 | 12339974 | BB | BB | BB | BB | BB | BB | NoCall | NoCall |
| SNP_A-1514630 | rs1074071 | 20 | 12633208 | BB     | BB     |
| SNP_A-1515199 | rs1099620 | 20 | 12738724 | AB | AB | AB | AB | AB | BB | AA     | AA     |
| SNP_A-1509681 | rs3908399 | 20 | 12849275 | AB | AA | AA | AB | AB | AB | AA     | AA     |
| SNP_A-1511747 | rs2327450 | 20 | 12925506 | BB | AB | AB | BB | BB | AB | BB     | BB     |
| SNP_A-1508911 | rs721243  | 20 | 13168601 | AB | BB | BB | AB | AB | AB | BB     | BB     |
| SNP_A-1514723 | rs719628  | 20 | 13210487 | AB | AB | AB | AB | AB | AA | BB     | BB     |

|                |           |    |          |    |    |    |    |    |    |    |    |
|----------------|-----------|----|----------|----|----|----|----|----|----|----|----|
| SNP_A-1513229  | rs2327790 | 20 | 13461712 | AB | BB | BB | AB | AB | AB | BB | BB |
| <b>C20orf7</b> |           |    |          |    |    |    |    |    |    |    |    |
| SNP_A-1519307  | rs1358766 | 20 | 13858933 | AB | AB | AB | AB | AB | BB | AA | AA |
| SNP_A-1513470  | rs724820  | 20 | 15015407 | AB | AB | AA | BB | BB | AB | AB | AB |

Overview of genotypes called by GDAS for the SNPs located in the homozygous region. For each marker the Affy-ID and physical position is indicated. Sample IDs refer to family IDs in figure1.
